# Validation of a habitat suitability index for oyster restoration

2

SETH J. THEUERKAUF<sup>1,2,3</sup> AND ROMUALD N. LIPCIUS<sup>1,4</sup>

<sup>1</sup>*Virginia Institute of Marine Science, College of William & Mary, P.O. Box 1346, Gloucester Point, VA 23062*

<sup>2</sup>*Department of Marine, Earth, and Atmospheric Sciences, Center for Marine Sciences and Technology, North Carolina State University, Morehead City, North Carolina 28557, USA. Tel.: + 1 252 222 6322*

<sup>3</sup>Email: [sjtheuer@ncsu.edu](mailto:sjtheuer@ncsu.edu)

<sup>4</sup>Email: [rom@vims.edu](mailto:rom@vims.edu)

*Abstract.* Habitat suitability index (HSI) models provide spatially explicit information on the capacity of a given habitat to support a species of interest, and their prevalence has increased dramatically in recent years. Despite caution that the reliability of HSIs must be validated using independent, quantitative data, most HSIs intended to inform terrestrial and marine species management remain unvalidated. Furthermore, of the eight HSI models developed for eastern oyster (*Crassostrea virginica*) restoration and fishery production, none has been validated. Consequently, we developed, calibrated, and validated an HSI for the eastern oyster to identify optimal habitat for restoration in a tributary of Chesapeake Bay, the Great Wicomico River (GWR). The GWR harbors an unparalleled, restored oyster population, and therefore serves as an excellent model system for assessing the validity of the HSI. The HSI was derived from GIS layers of bottom type, salinity, and water depth (surrogate for dissolved oxygen), and was tested using live adult oyster density data from a survey of high vertical relief reefs (HRR) and low vertical relief reefs (LRR) in the sanctuary network. Live adult oyster density was a statistically-significant sigmoid function of the HSI, which validates the HSI as a robust predictor of suitable oyster reef habitat for rehabilitation or restoration. In addition, HRR had on average 103-116 more adults  $\text{m}^{-2}$  than LRR at a given level of the HSI. For HRR, HSI values  $\geq 0.3$  exceeded the accepted restoration target of 50 live adult oysters  $\text{m}^{-2}$ . For LRR, the HSI was generally able to predict live adult oyster densities that meet or exceed the target at HSI values  $\geq 0.3$ . The HSI indicated that there remain large areas of suitable habitat for restoration in the GWR. This study provides a robust framework for HSI model development and validation, which can be refined and applied to other systems and previously developed HSIs to improve the efficacy of native oyster restoration.

*Key words:* *Habitat Suitability Index, oyster restoration, eastern oyster, C.*

2 *virginica.*

## INTRODUCTION

4 Habitat suitability indices (HSI) are a commonly developed and often robust spatially  
explicit, decision support model used to identify the capacity of a given habitat to support  
6 a species of interest (U. S. Fish and Wildlife Service 1981, Roloff and Kernohan 1999). In  
1981, the United States Fish and Wildlife Service proposed and developed the first HSI  
8 models, which were intended to quantify the value of habitats when considering  
management alternatives in species-specific conservation and restoration (U. S. Fish and  
10 Wildlife Service 1981). HSIs are commonly generated through application of  
wildlife-habitat relationships to relevant geospatial environmental data within a  
12 Geographic Information System (GIS) to develop a composite HSI score with a range of 0  
to 1, representing unsuitable to optimal habitat (Brooks 1997). Depending on the  
14 relevance of the selected habitat variables, quality of the geospatial environmental data,  
and reliability of the applied wildlife-habitat relationships, these models can serve as  
16 robust spatial tools to inform species management.

Although the USFWS emphasized the need for validation of HSIs, or the quantitative  
18 assessment of an HSI's ability to predict habitat suitability via an independent data set,  
most HSIs intended to inform the management of terrestrial and marine species have not  
20 been validated (Brooks 1997, Araújo and Guisan 2006). Recent HSI validation studies  
have indicated that unvalidated HSIs can be unreliable indicators of habitat quality  
22 (Reiley et al. 2014). Although widely used, HSI models have been criticized as unreliable  
and lacking scientific rigor (Cole and Smith 1983, Roloff and Kernohan 1999). Despite the  
24 potential cost associated with obtaining these independent datasets, the validation process  
is required to determine the reliability and utility of these models if they are to inform  
26 species conservation and management (Brooks 1997, Tirpak et al. 2009, Reiley et al.

2014).

2 To implement HSI models confidently, they must be tested for accuracy in a four-step  
process (Brooks 1997, Tirpak et al. 2009, Reiley et al. 2014): development, calibration,  
4 verification, and validation. Development involves the use of wildlife-habitat relationships  
to generate an HSI ranging from 0, representing unsuitable habitat, to 1, representing  
6 optimal habitat. Calibration aims to ensure that the HSI spans the full range of values  
from 0 to 1. Brooks (1997) notes: "The intent is for sites of excellent habitat quality to  
8 receive high scores (e.g., 0.7-1.0), and sites of poor habitat quality to receive low scores  
(e.g., 0-0.3). If the HSI scores do not ordinate across the entire range of values from 0 to 1,  
10 then they will be of little use in describing differences among sites." Verification entails  
assessment of performance of an HSI model against independent qualitative or categorical  
12 (ranked) data. A positive correlation of ranked data, such as presence/absence, and HSI  
values would provide verification. Validation involves testing the performance of an HSI  
14 model against independent quantitative data in space and time, such as against population  
density or abundance. If validation has been accomplished, verification is not necessary. A  
16 note of caution pertains to the use of different, non-independent data for validation. For  
example, a dataset for a single ecosystem, such as a tributary, could be split in half. One  
18 half of the dataset could be used to develop an HSI, and the second half used to test the  
fit of the HSI model. This would not constitute validation because the data used to test  
20 the HSI are not statistically independent of the data used to develop the model.

Few HSIs developed for marine or estuarine species of conservation interest have been  
22 verified or validated through use of independent data. Brown and Hartwick (1988) were  
the first to validate an HSI for a marine species, though it was for aquaculture of the  
24 introduced Pacific oyster *Crasostrea gigas* in British Columbia, Canada, not for native  
oyster restoration. Brown et al. (2000) verified HSI models for various fish and  
26 invertebrate species (alewife *Alosa pseudoharengus*, American sand lance *Ammodytes  
americanus*, Atlantic salmon *Salmo salar*, Atlantic tomcod *Microgadus tomcod*, common

mummichog *Fundulus heteroclitus*, winter flounder *Pleuronectes americanus*, American  
2 lobster *Homarus americanus*, and soft-shell clam *Mya arenaria*) in an estuarine system.  
Validation of HSI models was also accomplished for the distribution of juvenile Atlantic  
4 salmon *S. salar* in a river (Guay et al. 2000) and coastal aquaculture farms of Pacific  
oyster *C. gigas* (Cho et al. 2012). Note that in this study, we focus on HSI models, and  
6 not on species distribution models such as MAXENT (Phillips and Dudík 2008), which  
have also been used to predict the distribution of marine species as a function of habitat  
8 features (e.g., Elsässer et al. (2010)).

Numerous HSI models have been developed to guide aquaculture, fishery production,  
10 and restoration of oyster species (Table 1). The first to derive a model of habitat quality  
for an oyster species was Galtsoff (1964) for the eastern oyster *C. virginica*. Galtsoff (1964)  
12 developed a mathematically simple model to evaluate potentially productive oyster bottom  
in Gulf of Mexico and south Atlantic coastal habitats. He used the sum of bottom  
14 condition, water movement, water temperature, salinity, food availability, sedimentation,  
diseases, competition, predation, and pollution, each of which ranged from 0-10. The  
16 model integrated singular point measurements for each variable to generate a composite  
score that would characterize a broad region and therefore cannot be considered an HSI.  
18 Galtsoff (1964) recognized that the model was overly simplistic because it weighted all of  
the variables equally and because the model needed to be revised for different geographic  
20 areas. Unfortunately, the model was additive in its habitat quality elements, such that a  
value of 0 in one habitat characteristic did not produce an index of 0, unlike contemporary  
22 HSI models.

Cake (1983) developed the first true HSI for the eastern oyster in the Gulf of Mexico,  
24 meaning that it was intended to be employed using spatially-explicit datasets to determine  
relative suitability of locations within a given system for fishery production. The Cake  
26 (1983) model represents a comprehensive oyster HSI that incorporates a broad suite of  
relevant environmental variables (Table 2). Soniat and Brody (1988) utilized

spatially-explicit environmental and oyster density datasets collected for 38 reef and  
2 non-reef sites to apply and verify the Cake (1983) HSI for Galveston Bay, Texas. Using  
oyster density data, the authors attempted to validate the original Cake (1983) model  
4 using a regression approach. However, the authors encountered the issue of lack of  
statistical independence due to oyster density (their response variable) also being  
6 incorporated as a variable in their model, and therefore recognized that the model could  
not be considered validated. The authors did benefit from removing oyster density from  
8 the model, testing the relationship between oyster density and various combinations of the  
variables incorporated into the original model (i.e., a model verification procedure), and  
10 subsequently developed a modified HSI that incorporated the significant explanatory  
variables.

12 With the advent of contemporary geographic information systems (GIS) software,  
many HSIs for oysters have been developed within the past decade (Table 2). The  
14 variables included within these models have varied widely, however, the most common  
variables utilized are salinity, bottom type or substrate, and water depth. Other variables,  
16 such as predator intensity, food availability, or pH are of unknown relevance for all systems  
and their integration into HSI models requires additional spatially-explicit datasets that  
18 rarely exist for most systems. Interestingly, the two most recent published models (Soniati  
et al. 2013, Swannack et al. 2014) and this study have converged on a simplified model  
20 structure that includes varied combinations of the most common variables utilized in  
previous HSIs (i.e., salinity, bottom type or substrate, and water depth), although the  
22 Soniat et al. (2013) and Swannack et al. (2014) models do not include water depth, which  
is a critical variable for Chesapeake Bay subtidal oyster reefs. Additionally, of the eight  
24 published oyster restoration HSIs, none has been validated using an independent,  
quantitative population dataset. Thus, the reliability of these HSI models for informing  
26 oyster restoration and management remains uncertain.

We developed, calibrated and validated an HSI for the eastern oyster in a tributary of

Chesapeake Bay, the Great Wicomico River (GWR). In 2004, the U.S. Army Corps of  
2 Engineers (ACE) constructed 34.4 ha of sanctuary oyster reef within the system (Schulte  
et al. 2009). Today, the GWR harbors an unparalleled, restored oyster population (Schulte  
4 et al. 2009), and therefore serves as an excellent model system for assessing the validity of  
an oyster HSI. Here, we describe the development of a simple, reliable HSI for the eastern  
6 oyster and present the results from a direct field validation of the model.

## MATERIAL AND METHODS

8

### *Study area*

The GWR is a tributary on the western shore of the lower Chesapeake Bay (Figure 1).  
10 The GWR is located approximately 10 km south of the Potomac River and 25 km north of  
the Rappahannock River, and has a small watershed consisting predominately of forested  
12 and agricultural lands (Southworth et al. 2010). The GWR is mesohaline and is considered  
a trap-type estuary with gyre-like water circulation patterns that has contributed to its  
14 history of significant natural oyster recruitment (Andrews 1979, Southworth et al. 2010).  
The system is characterized by a single, central deep channel with an extensive sand shoal  
16 near the river mouth (Southworth et al. 2010). Oysters within the system exist on public  
oyster grounds, private lease areas, and no-harvest oyster sanctuaries (Schulte et al. 2009,  
18 Southworth et al. 2010).

### *HSI development*

20 This HSI was developed in ESRI ArcGIS 10.1 (Environmental Systems Research Institute  
2011), and followed a standard logical framework used in the development of previous HSI  
22 models (Cake 1983, Battista 1999), except that we added a validation step with  
independent survey data. The steps in HSI development were as follows:

- 24 (i) Assimilation of data sets on environmental variables (e.g., salinity);
- (ii) Assessment of habitat requirements for eastern oyster from a literature review;

(iii) Construction of ArcGIS environmental layers;

(iv) Formulation of suitability functions for each of the environmental variables;

(v) Calculation of the HSI for the river system;

(vi) Collection of eastern oyster abundance data for the system from a population survey; and,

(vii) Comparison of HSI values and oyster abundance.

The HSI was derived from Geographic Information System (GIS) layers of environmental and biotic variables, including bottom type, land use, salinity, existence of private oyster leases and public oyster grounds, seagrass cover, dissolved oxygen, and water depth for most of the GWR at depths deeper than 2 m. From these variables, we selected those of greatest relevance to site suitability for oyster restoration in the GWR and for which there was river-wide data, which included bottom type, depth, and salinity (Figure 2). Bottom type was included in this study as oyster reefs constructed on sand, rock or oyster shell are less likely to subside than those built on mud or silt bottom (Schulte et al. 2009). Depth was included as benthic community abundance and diversity decline significantly at low dissolved oxygen (DO) levels (Long and Seitz 2009, Seitz et al. 2009), and depth is a robust surrogate for DO (Powers et al. 2005). During the summer in western shore tributaries of Chesapeake Bay, such as the GWR, DO remains high down to about 4 m (Seitz et al. 2009), after which it declines sharply to 0 mg l<sup>-1</sup> around 5 m. This general trend is due to seasonal benthic anoxia and hypoxia events induced by decomposition of plankton and subsequent stratification of the water column (Kemp et al. 2005). Salinity was included as the eastern oyster cannot tolerate extremely low or high salinities for long periods, and prefers upper mesohaline to polyhaline salinities (Battista 1999, Barnes et al. 2007, Carnegie and Burreson 2011, Battista 1999).

Data for GIS layers of bottom type were derived from multiple sources including: 1) a 2009 NOAA acoustic seabed mapping survey (1 m x 1 m resolution), and 2) field notes taken by VIMS researchers during the 2012 reef monitoring sampling of the ACE reefs



(Bruce et al. 2010). Bottom type data derived from the 2009 NOAA acoustic seabed  
2 mapping survey included the majority of downriver bottom, but excluded inshore areas  
shallower than 2 m due to the inability of the research vessel to navigate shallow waters  
4 (Bruce et al. 2010). Bottom type data derived from field notes (approximately 40 points  
per reef) were imported into ArcGIS (Environmental Systems Research Institute 2011) as  
6 point data and were subsequently used along with the bottom type data derived from the  
2009 NOAA acoustic seabed mapping survey to supplement the delineation of bottom type  
8 contours of characteristic grain sizes (e.g., muddy sand). Bottom type information derived  
from the 2009 NOAA acoustic seabed mapping survey was utilized for the areas outside of  
10 the ACE constructed oyster reef polygons, while bottom type information from the field  
sampling notes taken by VIMS researchers was also utilized for the areas within the ACE  
12 constructed oyster reef polygons. This provided a baseline (i.e., pre-construction) bottom  
type dataset for integration into the HSI. This baseline bottom type dataset was necessary  
14 as some of the reefs within the sanctuary reef network were originally constructed on  
unsuitable bottom and have degraded since the 2009 NOAA acoustic seabed mapping  
16 survey.

Mean bottom salinity data were derived from a VIMS hydrodynamic model developed  
18 for tributaries of Chesapeake Bay (J. Shen, unpublished data). Salinity data were  
imported into ArcGIS (Environmental Systems Research Institute 2011) as point data (1  
20 m nodes), and were subsequently converted to produce a raster grid (1 m x 1 m  
resolution). Bathymetric data were derived from a NOAA bathymetric digital elevation  
22 model of the Chesapeake Bay (1 m x 1 m resolution) (Bruce et al. 2010).

Within ArcGIS (Environmental Systems Research Institute 2011), each input variable  
24 layer was assigned suitability index values based on physiological tolerance ranges available  
in the literature, or from on-going research of the ACE reefs in the GWR. Data cells  
26 within each input variable layer were classified on a gradient between 0, indicating highly  
unsuitable habitat, and 1, indicating highly suitable habitat, with varying degrees of

suitability in between. In order to ensure that the HSI would assign a particular location a value of '0' (unsuitable) if any single input variable layer had a value of '0,' the geometric mean of each input variable layer was calculated to produce the HSI. Mathematically, the HSI was computed as follows:

$$HSI = \sqrt[3]{BottomType * Depth * Salinity} \quad (1)$$

### *HSI validation*

In Chesapeake Bay, a live adult oyster density of 50 m<sup>-2</sup> is the abundance target for a restored reef to be considered successful by the Sustainable Fisheries Goal Implementation Team of the Chesapeake Bay Program (Sustainable Fisheries Goal Implementation Team 2011). Thus, live adult oyster density data derived from the 2011 VIMS monitoring survey of the ACE restored reefs in the GWR were used to validate the model.

The 2011 VIMS monitoring survey involved sampling HRR and LRR sanctuary oyster reefs (Figure 3) via patent tong. The sampling methodology followed standard procedures under Stratified Random Sampling (Cochran 1977, Thompson 2012). Reef types were then apportioned into strata (i.e., HRR, LRR) using information from side-scan sonar maps. Stratum area and variance estimates were used to generate random, stratum-specific nominal sampling sites and backup sites within a grid surrounding each of the reef polygons (Figure 3), using stratified random sampling with sample allocation proportional to stratum area and variance (Cochran 1977, Thompson 2012). Sampling sites were located by GPS coordinates, and sampled in the order in which they were generated to assure random sampling within each stratum. At each sampling site, the vessel was triple-anchored to maintain position. Next, a patent tong (1 m wide) was deployed, the sample was retrieved on a processing table aboard the vessel, and a photo taken of the sample with its identification number visible on a whiteboard. A complete 0.5 m<sup>2</sup> section of the 1 m<sup>2</sup> tong sample was rinsed and retained for lab processing. Samples were

processed in the laboratory, rather than in the field, due to the high probability that  
2 individual oysters would not be easily seen in the field, resulting in biased (inaccurate)  
samples. Parameter estimates for density and abundance were obtained using the R  
4 statistics package (R Core Team 2015).

## RESULTS

### 6 *HSI distribution in the Great Wicomico River*

Bottom type and depth were the primary drivers of a particular site's suitability (Figure  
8 4). The river's bathymetry, which consists of a deep, soft bottom channel flanked by  
shallow, hard bottom shelves mirrors the observed suitability trends. Despite the most  
10 suitable locations existing in shallow depth areas, patches of unsuitable bottom intermixed  
in these areas constrain their extent. Additionally, in upriver locations, lower salinity  
12 waters reduces the extent of highly suitable habitat.

### *HSI calibration and validation*

14 After computation of the HSI, the model was calibrated through linear rescaling of the  
HSI values to ensure the model ranged from 0 to 1. Live adult oyster density was a  
16 statistically-significant sigmoid function of the HSI (Figure 5), thereby validating the HSI  
as a robust predictor of suitable oyster reef habitat for rehabilitation or restoration in the  
18 GWR. In addition, high-relief reef had on average 103-116 more adults  $\text{m}^{-2}$  than low-relief  
reef at a given level of the HSI. For high-relief reefs, HSI values  $\geq 0.3$  exceeded the 50 live  
20 adult oysters  $\text{m}^{-2}$  target (Figure 5). For low-relief reefs, the HSI was generally able to  
predict live adult oyster densities that meet or exceed the target at HSI values  $\geq 0.3$ .  
22 However, for low-relief reefs, there was more variation between the HSI value and the  
corresponding live adult oyster density than for high-relief reefs. To maximize the  
24 potential for success of oyster reef restoration and rehabilitation, suitable oyster habitat  
was defined as all areas with an HSI value  $\geq 0.5$ , and marginal oyster habitat was defined

as all areas with an HSI value  $\geq 0.3$ .

2

### *Suitable habitat*

This study identified that approximately 157.8 ha of suitable oyster habitat (e.g., cells  
4 with a HSI value between 0.5 and 1.0) occur in the GWR. Approximately 2.4 ha of  
marginally suitable oyster habitat (e.g., cells with an HSI value between 0.3 and 0.5) occur  
6 in the GWR. Approximately 92.7 ha of suitable oyster habitat lay within private shellfish  
aquaculture leases, along with approximately 0.8 ha of marginally suitable oyster habitat.  
8 Within the 288.5 ha of public oyster harvest grounds, approximately 52.6 ha of suitable  
oyster habitat and 0 ha of marginally suitable oyster habitat exist. On the ACE high-relief  
10 reef, approximately 13.4 ha of suitable oyster habitat and approximately 0.2 ha of  
marginally suitable habitat exist. On the ACE low-relief reef, approximately 9.7 ha of  
12 suitable oyster habitat and approximately 0.2 ha of marginally suitable oyster habitat  
exist. It is important to note that, due to the lack of available bottom type data for  
14 shallow areas, the total amount of suitable habitat available in the GWR is greater than  
the amount estimated here. As the majority of shallow areas in the GWR are held in the  
16 form of private shellfish aquaculture leases, most of this additional suitable habitat is likely  
contained within the private shellfish aquaculture leases.

18

### DISCUSSION

Habitat suitability indices provide a quantitative tool that integrates the best available  
20 environmental data and corresponding science to identify locations with the most potential  
for successful restoration (U. S. Fish and Wildlife Service 1981, Roloff and Kernohan  
22 1999), but their efficacy depends critically on validation with independent data (Araújo  
and Guisan 2006, Brooks 1997, Tirpak et al. 2009, Reiley et al. 2014). Of the eight  
24 published HSI models used in native oyster restoration and fishery production (Table 1),  
none has been validated. Our key contributions are thus the (i) development, calibration

and validation of a relatively simple HSI model for restoration of the eastern oyster

2 *Crassostrea virginica*, (ii) demonstration of the value of including a key factor, in this case  
reef relief, in the implementation of the HSI model, and (iii) identification of oyster  
4 abundance as a sigmoid function of the HSI. The HSI was validated with data from a  
metapopulation undergoing restoration in the GWR (Schulte et al. 2009), and depended  
6 largely on bottom type, salinity, and water depth, a surrogate for dissolved oxygen  
concentration. Given the extensive effort being dedicated to eastern oyster restoration  
8 across the Atlantic and Gulf of Mexico coasts, our findings should enhance the efficiency  
and effectiveness of such efforts, and likely for other native oyster species worldwide.

10 Some of the previous oyster HSI models have included additional variables, such as  
turbidity and predation intensity (Table 2), for smaller or more intensively studied  
12 waterbodies, where these spatial data sets are available. For larger or less studied  
waterbodies, spatial data sets for large suites of environmental variables are often rare.  
14 Further, based on the wide range of environmental and biotic variables included in prior  
HSI models (Table 2), it is clear that a "one size fits all" approach to HSI modeling is  
16 inappropriate. While many variables that determine habitat suitability overlap between  
species and systems, variables that are significant drivers in a given system may not be as  
18 critical as other variables. For instance, of the four oyster HSI models developed for  
specific systems (i.e., Caloosahatchee Estuary, Florida by Barnes et al. (2007), Hudson  
20 River, New York by Starke et al. (2011), Mission-Aransas Estuary, Texas by Pollack et al.  
(2012), Mississippi River, Louisiana by Soniat et al. (2013)), only a single variable was  
22 used by all four (i.e., average salinity), yet they used a total of seven other variables that  
were not in common (Table 2).

24 The eastern oyster provides an excellent example of this variability in requirements in  
that its geographic range encompasses the (i) Atlantic coast from Canada to Florida, (ii)  
26 Gulf of Mexico coast, and (iii) Caribbean from the Yucatan Peninsula to the West Indies  
(Buroker 1983), which spans no less than five biogeographic provinces containing a diverse

suite of habitats across temperate, subtropical and tropical areas (Kennedy et al. 1996).

2 When using HSI models that incorporate a small subset of variables, such as only salinity  
and substrate (e.g., Soniat et al. (2013), Swannack et al. (2014)), it is especially valuable  
4 to conduct model validation. Such simple models trade incorporation of large suites of  
environmental layers (for which there are rarely comprehensive spatial datasets for large  
6 areas) for broader spatial coverage, with the underlying assumption being that oyster  
habitat suitability can be adequately described by salinity and substrate alone. In the case  
8 of Chesapeake Bay, for which seasonal anoxia and hypoxia are prevalent in deeper waters,  
omission of a variable that encapsulated dissolved oxygen (i.e., water depth) may lead to  
10 an HSI erroneously overstating the extent of suitable oyster habitat for restoration. In this  
case, water depth was an effective, if imperfect, surrogate for dissolved oxygen, and was  
12 largely accountable for the performance of the HSI model along with bottom type.

Bathymetric information is often available for most waterbodies, and an understanding of  
14 the relationship between depth and dissolved oxygen concentrations can be useful to  
eliminate areas of hypoxia or anoxia in restoration efforts by use of HSI models. In the  
16 case of the GWR, seasonal hypoxia in areas deeper than 4 m, reduced salinity in upriver  
locations, and subsidence of reef material in areas of soft sediments had previously been  
18 identified as priority factors that could negatively impact the success of oyster restoration.  
Thus, developing an HSI that integrates the variables known to be major drivers of  
20 restoration success in a particular system with subsequent validation and model refinement  
is the optimal, robust approach.

22 Given the commonly stated goal for oyster restoration projects of oyster abundance  
and biomass enhancement, live adult oyster density data derived from the 2011 survey of  
24 the ACE restored reefs in the GWR were used to validate the model. Our use of live adult  
oyster density data from seven years post-restoration allowed us to avoid biases resulting  
26 from anomalous recruitment events. In addition, when using oyster density data to  
conduct HSI model validation, it is important to differentiate live adult oyster density and

total live oyster density. Immediately following restoration, oyster sanctuaries can  
2 experience major recruitment pulses that can temporarily inflate total oyster density with  
size structure skewed towards high densities of recruits and sub-adults, which have reduced  
4 probabilities of survival relative to adults (Puckett and Eggleston 2012).

Our division of the analysis of live adult oyster densities and corresponding HSI values  
6 into low- and high-relief reef categories was necessary as some of the low-relief reefs  
constructed in the GWR had degraded due to sedimentation and subsidence into mud  
8 seabottom. For low-relief reefs, reef persistence depends greatly on whether live oyster  
shell accretion outpaces subsidence and sedimentation (Schulte et al. 2009, Jordan-Cooley  
10 et al. 2011, Colden and Lipcius 2015, Lipcius et al. 2015). In several cases, low-relief reefs  
in the GWR with HSI values  $\geq 0.3$  exhibited low live adult oyster densities. These  
12 low-relief reefs containing suitable oyster habitat should be examined as candidates for  
rehabilitation to high-relief reefs through the placement of additional shell material on the  
14 low relief sites. The majority of high-relief reefs in the GWR have persisted due to the  
accretion of additional shell material, which allows the reef matrix to outpace subsidence  
16 and sedimentation and thereby maintain a positive shell budget (Powell et al. 2012).  
These finding lends support to the existence of bistability (i.e., alternative stable  
18 states—persistent reef or degraded reef—existing under similar environmental conditions) on  
the restored oyster reefs in the GWR. In the persistent state, high-relief reefs (i) offset  
20 heavy sedimentation, (ii) promote larval settlement and survival, juvenile survival and  
growth, and adult disease resistance and survival, (iii) lead to elevated adult abundance  
22 and reef accretion, and (iv) have high adult abundance which enhances settlement and  
recruitment, thereby constituting a positive feedback cycle. In contrast, in the low-relief  
24 degraded state (i) there is heavy sediment deposition, (ii) thick sediments on the reef  
inhibit larval settlement and juvenile/adult survival, (iii) low adult abundance limits reef  
26 accretion, and (iv) depressed adult abundance and reef height preclude high settlement  
and facilitate heavy sediment accumulation, leading to a downward spiral towards a

degraded reef and local extinction of the oyster population (Jordan-Cooley et al. 2011).

2 Live adult oyster density was a sigmoid function of the HSI for both low- and  
high-relief reefs. The sigmoid relationship differs from the linear relationship between  
4 density and HSI in previous validated studies (Reiley et al. 2014, Cho et al. 2012). The  
sigmoid relationship implies, for both low- and high-relief reef categories, a stasis in oyster  
6 density below an HSI of 0.3, and a rapid increase in oyster density with increasing HSI to  
a value likely corresponding with a site's carrying capacity. Low-relief reefs in areas with  
8 an HSI  $\leq 0.3$  are unlikely to exceed performance standards, such as that of the Sustainable  
Fisheries Goal Implementation Team (2011)—live adult oyster density target of 50 m<sup>-2</sup>.  
10 However, in areas of low-relief reef with an HSI  $\geq 0.3$ , density rapidly increases to nearly  
double the 50 live adult oysters m<sup>-2</sup> target in low-relief reef areas with an HSI of 1.  
12 Contrasting this, for high-relief reef in areas with an HSI as low as 0, the 50 live adult  
oysters m<sup>-2</sup> target is exceeded with a rapid increase in density to nearly 5x the target at  
14 an HSI of 1, although the long-term sustainability of reefs in areas with low associated HSI  
values is questionable. This finding also provides further support to the existence of  
16 bistability on the restored oyster reefs in the GWR in that under similar environmental  
conditions (i.e., for a given level of HSI), low- and high-relief reefs remain differentiated by  
18 oyster density.

With the increasing availability of spatial datasets for environmental variables in  
20 marine and estuarine systems, habitat suitability indices will likely continue to be  
developed to inform species conservation and management. However, as cautioned by the  
22 USFWS shortly after the development of the first HSIs in the 1980s, the performance of  
these models must be quantitatively assessed via an independent dataset. This study  
24 provides a robust framework for HSI model development and validation, which can be  
refined and applied to other systems and previously developed HSIs to improve the efficacy  
26 of native oyster restoration.



## ACKNOWLEDGMENTS

2 We thank the VIMS Marine Conservation Biology and Community Ecology Labs for their  
assistance with oyster sampling. We thank KW Theuerkauf and anonymous reviewers for helpful  
4 comments that improved this manuscript, and David Bruce of the National Oceanic and  
Atmospheric Administration, Chesapeake Bay Office for technical assistance with the benthic  
6 habitat maps. Funding for the project and completion of the manuscript were provided by the  
College of William and Mary Roy R. Charles Center for Academic Excellence through an Honors  
8 Fellowship, James Monroe Scholarship, and Center for Geospatial Analysis Student Research  
Grant awarded to SJT, as well as grants from the U.S. Army Corps of Engineers, Norfolk  
10 District, the National Science Foundation's Mathematical Biology program, and the National  
Oceanic and Atmospheric Administration, Chesapeake Bay Office to RNL. This is Contribution  
12 No. XXXX of the Virginia Institute of Marine Science, College of William & Mary.

## LITERATURE CITED

- 14 Andrews, J., 1979. Pelecypoda: Ostreidae. Pages 293–341 *in* A. Giese and J. Pearse, editors.  
Reproduction of Marine Invertebrates. Academic Press.
- 16 Araújo, M. B., and A. Guisan. 2006. Five (or so) challenges for species distribution modelling.  
Journal of Biogeography **33**:1677–1688.
- 18 Barnes, T., A. Volety, K. Chartier, F. Mazzotti, and L. Pearlstine. 2007. A habitat suitability  
index model for the eastern oyster *Crassostrea virginica*, a tool for restoration of the  
20 Caloosahatchee Estuary, Florida. Journal of Shellfish Research **26**:949–959.
- Battista, T., 1999. Habitat suitability index for the eastern oyster *Crassostrea virginica*, in the  
22 Chesapeake Bay: a geographic information system approach. University of Maryland at College  
Park Masters Thesis.
- 24 Brooks, R. P. 1997. Improving habitat suitability index models. Wildlife Society Bulletin  
**25**:163–167.

- 1 Brown, J., and E. Hartwick. 1988. A habitat suitability index model for suspended tray culture of  
2 the Pacific oyster, *Crassostrea gigas* Thunberg. *Aquaculture Research* **19**:109–126.
- 3  
4 Brown, S. K., K. R. Buja, S. H. Jury, M. E. Monaco, and A. Banner. 2000. Habitat suitability  
5 index models for eight fish and invertebrate species in Casco and Sheepscot Bays, Maine.  
6 *North American Journal of Fisheries Management* **20**:408–435.
- 7  
8 Bruce, D., J. Lazar, and S. Giordano. 2010. Acoustic seabed mapping in the Great Wicomico  
9 River (2009). NOAA Chesapeake Bay Office Habitat Assessment Team Final Report .
- 10  
11 Buroker, N. E. 1983. Population genetics of the American oyster *Crassostrea virginica* along the  
12 Atlantic coast and the Gulf of Mexico. *Marine Biology* **75**:99–112.
- 13  
14 Cake, E. 1983. Habitat suitability index models: Gulf of Mexico American Oyster. *FWS/OBS*  
15 **82**:1–37.
- 16  
17 Carnegie, R. B., and E. M. Burreson. 2011. Declining impact of an introduced pathogen:  
18 *Haplosporidium nelsoni* in the oyster *Crassostrea virginica* in Chesapeake Bay. *Marine Ecology*  
19 *Progress Series* **432**:1–15.
- 20  
21 Cho, Y., W.-C. Lee, S. Hong, H.-C. Kim, and J. B. Kim. 2012. GIS-based suitable site selection  
22 using habitat suitability index for oyster farms in Geoje-Hansan Bay, Korea. *Ocean & Coastal*  
23 *Management* **56**:10–16.
- 24  
25 Cochran, W. 1977. Stratified random sampling. *Sampling techniques* pages 89–114.
- 26  
27 Colden, A. M., and R. N. Lipcius. 2015. Lethal and sublethal effects of sediment burial on the  
28 eastern oyster *Crassostrea virginica*. *Marine Ecology Progress Series* **527**:105.
- 29  
30  
31  
32  
33  
34  
35  
36  
37  
38  
39  
40  
41  
42  
43  
44  
45  
46  
47  
48  
49  
50  
51  
52  
53  
54  
55  
56  
57  
58  
59  
60  
61  
62  
63  
64  
65  
66  
67  
68  
69  
70  
71  
72  
73  
74  
75  
76  
77  
78  
79  
80  
81  
82  
83  
84  
85  
86  
87  
88  
89  
90  
91  
92  
93  
94  
95  
96  
97  
98  
99  
100  
101  
102  
103  
104  
105  
106  
107  
108  
109  
110  
111  
112  
113  
114  
115  
116  
117  
118  
119  
120  
121  
122  
123  
124  
125  
126  
127  
128  
129  
130  
131  
132  
133  
134  
135  
136  
137  
138  
139  
140  
141  
142  
143  
144  
145  
146  
147  
148  
149  
150  
151  
152  
153  
154  
155  
156  
157  
158  
159  
160  
161  
162  
163  
164  
165  
166  
167  
168  
169  
170  
171  
172  
173  
174  
175  
176  
177  
178  
179  
180  
181  
182  
183  
184  
185  
186  
187  
188  
189  
190  
191  
192  
193  
194  
195  
196  
197  
198  
199  
200  
201  
202  
203  
204  
205  
206  
207  
208  
209  
210  
211  
212  
213  
214  
215  
216  
217  
218  
219  
220  
221  
222  
223  
224  
225  
226  
227  
228  
229  
230  
231  
232  
233  
234  
235  
236  
237  
238  
239  
240  
241  
242  
243  
244  
245  
246  
247  
248  
249  
250  
251  
252  
253  
254  
255  
256  
257  
258  
259  
260  
261  
262  
263  
264  
265  
266  
267  
268  
269  
270  
271  
272  
273  
274  
275  
276  
277  
278  
279  
280  
281  
282  
283  
284  
285  
286  
287  
288  
289  
290  
291  
292  
293  
294  
295  
296  
297  
298  
299  
300  
301  
302  
303  
304  
305  
306  
307  
308  
309  
310  
311  
312  
313  
314  
315  
316  
317  
318  
319  
320  
321  
322  
323  
324  
325  
326  
327  
328  
329  
330  
331  
332  
333  
334  
335  
336  
337  
338  
339  
340  
341  
342  
343  
344  
345  
346  
347  
348  
349  
350  
351  
352  
353  
354  
355  
356  
357  
358  
359  
360  
361  
362  
363  
364  
365  
366  
367  
368  
369  
370  
371  
372  
373  
374  
375  
376  
377  
378  
379  
380  
381  
382  
383  
384  
385  
386  
387  
388  
389  
390  
391  
392  
393  
394  
395  
396  
397  
398  
399  
400  
401  
402  
403  
404  
405  
406  
407  
408  
409  
410  
411  
412  
413  
414  
415  
416  
417  
418  
419  
420  
421  
422  
423  
424  
425  
426  
427  
428  
429  
430  
431  
432  
433  
434  
435  
436  
437  
438  
439  
440  
441  
442  
443  
444  
445  
446  
447  
448  
449  
450  
451  
452  
453  
454  
455  
456  
457  
458  
459  
460  
461  
462  
463  
464  
465  
466  
467  
468  
469  
470  
471  
472  
473  
474  
475  
476  
477  
478  
479  
480  
481  
482  
483  
484  
485  
486  
487  
488  
489  
490  
491  
492  
493  
494  
495  
496  
497  
498  
499  
500  
501  
502  
503  
504  
505  
506  
507  
508  
509  
510  
511  
512  
513  
514  
515  
516  
517  
518  
519  
520  
521  
522  
523  
524  
525  
526  
527  
528  
529  
530  
531  
532  
533  
534  
535  
536  
537  
538  
539  
540  
541  
542  
543  
544  
545  
546  
547  
548  
549  
550  
551  
552  
553  
554  
555  
556  
557  
558  
559  
560  
561  
562  
563  
564  
565  
566  
567  
568  
569  
570  
571  
572  
573  
574  
575  
576  
577  
578  
579  
580  
581  
582  
583  
584  
585  
586  
587  
588  
589  
590  
591  
592  
593  
594  
595  
596  
597  
598  
599  
600  
601  
602  
603  
604  
605  
606  
607  
608  
609  
610  
611  
612  
613  
614  
615  
616  
617  
618  
619  
620  
621  
622  
623  
624  
625  
626  
627  
628  
629  
630  
631  
632  
633  
634  
635  
636  
637  
638  
639  
640  
641  
642  
643  
644  
645  
646  
647  
648  
649  
650  
651  
652  
653  
654  
655  
656  
657  
658  
659  
660  
661  
662  
663  
664  
665  
666  
667  
668  
669  
670  
671  
672  
673  
674  
675  
676  
677  
678  
679  
680  
681  
682  
683  
684  
685  
686  
687  
688  
689  
690  
691  
692  
693  
694  
695  
696  
697  
698  
699  
700  
701  
702  
703  
704  
705  
706  
707  
708  
709  
710  
711  
712  
713  
714  
715  
716  
717  
718  
719  
720  
721  
722  
723  
724  
725  
726  
727  
728  
729  
730  
731  
732  
733  
734  
735  
736  
737  
738  
739  
740  
741  
742  
743  
744  
745  
746  
747  
748  
749  
750  
751  
752  
753  
754  
755  
756  
757  
758  
759  
760  
761  
762  
763  
764  
765  
766  
767  
768  
769  
770  
771  
772  
773  
774  
775  
776  
777  
778  
779  
780  
781  
782  
783  
784  
785  
786  
787  
788  
789  
790  
791  
792  
793  
794  
795  
796  
797  
798  
799  
800  
801  
802  
803  
804  
805  
806  
807  
808  
809  
810  
811  
812  
813  
814  
815  
816  
817  
818  
819  
820  
821  
822  
823  
824  
825  
826  
827  
828  
829  
830  
831  
832  
833  
834  
835  
836  
837  
838  
839  
840  
841  
842  
843  
844  
845  
846  
847  
848  
849  
850  
851  
852  
853  
854  
855  
856  
857  
858  
859  
860  
861  
862  
863  
864  
865  
866  
867  
868  
869  
870  
871  
872  
873  
874  
875  
876  
877  
878  
879  
880  
881  
882  
883  
884  
885  
886  
887  
888  
889  
890  
891  
892  
893  
894  
895  
896  
897  
898  
899  
900  
901  
902  
903  
904  
905  
906  
907  
908  
909  
910  
911  
912  
913  
914  
915  
916  
917  
918  
919  
920  
921  
922  
923  
924  
925  
926  
927  
928  
929  
930  
931  
932  
933  
934  
935  
936  
937  
938  
939  
940  
941  
942  
943  
944  
945  
946  
947  
948  
949  
950  
951  
952  
953  
954  
955  
956  
957  
958  
959  
960  
961  
962  
963  
964  
965  
966  
967  
968  
969  
970  
971  
972  
973  
974  
975  
976  
977  
978  
979  
980  
981  
982  
983  
984  
985  
986  
987  
988  
989  
990  
991  
992  
993  
994  
995  
996  
997  
998  
999  
1000

Environmental Systems Research Institute, 2011. ArcGIS desktop: Release 10.1. Redlands,  
2 California.

Galtsoff, P. S. 1964. The American Oyster. Fishery Bulletin, US Fish and Wildlife Service  
4 **64**:1–480.

Guay, J., D. Boisclair, D. Rioux, M. Leclerc, M. Lapointe, and P. Legendre. 2000. Development  
6 and validation of numerical habitat models for juveniles of Atlantic salmon (*Salmo salar*).  
Canadian Journal of Fisheries and Aquatic Sciences **57**:2065–2075.

Jordan-Cooley, W. C., R. N. Lipcius, L. B. Shaw, J. Shen, and J. Shi. 2011. Bistability in a  
8 differential equation model of oyster reef height and sediment accumulation. Journal of  
Theoretical Biology **289**:1–11.  
10

Kemp, W., W. Boynton, J. Adolf, D. Boesch, W. Boicourt, G. Brush, J. Cornwell, T. Fisher,  
12 P. Glibert, J. Hagy, et al. 2005. Eutrophication of Chesapeake Bay: historical trends and  
ecological interactions. Marine Ecology Progress Series **303**:1–29.

14 Kennedy, V., R. Newell, and A. Eble. 1996. The Eastern Oyster *Crassostrea virginica*. Maryland  
Sea Grant.

Lipcius, R. N., R. P. Burke, D. N. McCulloch, S. J. Schreiber, D. M. Schulte, R. D. Seitz, and  
16 J. Shen. 2015. Overcoming restoration paradigms: value of the historical record and  
metapopulation dynamics in native oyster restoration. Frontiers in Marine Science **2**:65.  
18

Long, W. C., and R. D. Seitz. 2009. Hypoxia in Chesapeake Bay tributaries: worsening effects on  
20 macrobenthic community structure in the York River. Estuaries and Coasts **32**:287–297.

Phillips, S. J., and M. Dudík. 2008. Modeling of species distributions with Maxent: new  
22 extensions and a comprehensive evaluation. Ecography **31**:161–175.

Pollack, J., A. Cleveland, T. Palmer, A. Reisinger, and P. Montagna. 2012. A restoration  
24 suitability index model for the eastern oyster *Crassostrea virginica* in the Mission-Aransas  
Estuary, TX, USA. PloS one **7**:e40839.

- Powell, E. N., J. M. Klinck, K. Ashton-Alcox, E. E. Hofmann, and J. Morson. 2012. The rise and  
2 fall of *Crassostrea virginica* oyster reefs: the role of disease and fishing in their demise and a  
vignette on their management. *Journal of Marine Research* **70**:505–558.
- 4 Powers, S. P., C. H. Peterson, R. R. Christian, E. Sullivan, M. J. Powers, M. J. Bishop, and C. P.  
Buzzelli. 2005. Effects of eutrophication on bottom habitat and prey resources of demersal  
6 fishes. *Marine Ecology Progress Series* **302**:233–243.
- Puckett, B. J., and D. B. Eggleston. 2012. Oyster demographics in a network of no-take reserves:  
8 recruitment, growth, survival, and density dependence. *Marine and Coastal Fisheries*  
**4**:605–627.
- 10 R Core Team, 2015. R: A Language and Environment for Statistical Computing. R Foundation  
for Statistical Computing, Vienna, Austria. URL <https://www.R-project.org>.
- 12 Reiley, B. M., J. C. Bednarz, and J. D. Brown. 2014. A test of the Swainson’s warbler habitat  
suitability index model. *Wildlife Society Bulletin* **38**:297–304.
- 14 Roloff, G. J., and B. J. Kernohan. 1999. Evaluating reliability of habitat suitability index models.  
*Wildlife Society Bulletin* **27**:973–985.
- 16 Schulte, D. M., R. P. Burke, and R. N. Lipcius. 2009. Unprecedented restoration of a native  
oyster metapopulation. *Science* **325**:1124–1128.
- 18 Seitz, R. D., D. M. Dauer, R. J. Llansó, and W. C. Long. 2009. Broad-scale effects of hypoxia on  
benthic community structure in Chesapeake Bay, USA. *Journal of Experimental Marine*  
20 *Biology and Ecology* **381**:S4–S12.
- Soniat, T. M., and M. S. Brody. 1988. Field validation of a habitat suitability index model for  
22 the American oyster. *Estuaries* **11**:87–95.
- Soniat, T. M., C. P. Conzelmann, J. D. Byrd, D. P. Roszell, J. L. Bridevaux, K. J. Suir, and S. B.  
24 Colley. 2013. Predicting the effects of proposed Mississippi River diversions on oyster habitat  
quality: application of an oyster habitat suitability index model. *Journal of Shellfish Research*  
26 **32**:629–638.

- Southworth, M., J. M. Harding, J. A. Wesson, and R. Mann. 2010. Oyster (*Crassostrea virginica*,  
2 Gmelin 1791) population dynamics on public reefs in the Great Wicomico River, Virginia,  
USA. *Journal of Shellfish Research* **29**:271–290.
- 4 Starke, A., J. Levinton, and M. Doall. 2011. Restoration of *Crassostrea virginica* (Gmelin) to the  
Hudson River, USA: A spatiotemporal modeling approach. *Journal of Shellfish Research*  
6 **30**:671–684.
- Sustainable Fisheries Goal Implementation Team. 2011. Restoration goals, quantitative metrics,  
8 and assessment protocols for evaluating success on restored oyster reef sanctuaries. Report of  
the Sustainable Fisheries Goal Implementation Team of the Chesapeake Bay Program .
- 10 Swannack, T. M., M. Reif, and T. M. Soniat. 2014. A robust, spatially explicit model for  
identifying oyster restoration sites: case studies on the Atlantic and Gulf coasts. *Journal of*  
12 *Shellfish Research* **33**:395–408.
- Thompson, S. K. 2012. *Sampling*. 3rd edition. Wiley series in probability and statistics, John  
14 Wiley & Sons, Hoboken, NJ.
- Tirpak, J. M., D. Jones-Farrand, F. R. Thompson, D. J. Twedt, C. K. Baxter, J. A. Fitzgerald,  
16 and W. B. Uihlein. 2009. Assessing ecoregional-scale habitat suitability index models for  
priority landbirds. *Journal of Wildlife Management* **73**:1307–1315.
- 18 U. S. Fish and Wildlife Service, 1981. Standards for the development of Habitat Suitability Index  
models. Technical Report 103 ESM, USDI Fish and Wildlife Service, Division of Ecological  
20 Services, Washington, D.C.

TABLE CAPTIONS

2 TABLE 1. Habitat suitability index models developed for oyster aquaculture, fishery  
production, and restoration. Calibration is achieved when the HSI approximately spans  
4 the full range from 0 to 1. Verification is achieved when the HSI values are positively  
correlated with independent qualitative or categorical (ranked) data, such as  
6 presence/absence data. Validation is achieved when the HSI values correlate positively  
with independent quantitative data in space and time, such as population density or  
8 abundance. If validation has been accomplished, verification is not necessary.

TABLE 2. Variables used in habitat suitability index models developed for oyster  
10 aquaculture, fishery production and restoration, and the models using each variable.  
1–Barnes et al. (2007), 2–Battista (1999), 3–Brown and Hartwick (1988), 4–Cake (1983),  
12 5–Cho et al. (2012), 6–Pollack et al. (2012), 7–Soniati and Brody (1988), 8–Soniati et al.  
(2013), 9–Starke et al. (2011), 10–Swannack et al. (2014), 11–This study.

TABLE 1. Habitat suitability index models developed for oyster aquaculture, fishery production, and restoration. Calibration is achieved when the HSI approximately spans the full range from 0 to 1. Verification is achieved when the HSI values are positively correlated with independent qualitative or categorical (ranked) data, such as presence/absence data. Validation is achieved when the HSI values correlate positively with independent quantitative data in space and time, such as population density or abundance. If validation has been accomplished, verification is not necessary.

| Authors                   | Species             | Calibrated? | Verified? | Validated? |
|---------------------------|---------------------|-------------|-----------|------------|
| <i>Aquaculture</i>        |                     |             |           |            |
| Brown and Hartwick (1988) | <i>C. gigas</i>     | No *        | Yes †     | Yes        |
| Cho et al. (2012)         | <i>C. gigas</i>     | No *        | Yes †     | Yes        |
| <i>Fishery production</i> |                     |             |           |            |
| Cake (1983)               | <i>C. virginica</i> | Yes         | No        | No         |
| Soniat and Brody (1988)   | <i>C. virginica</i> | Yes         | Yes       | No         |
| <i>Restoration</i>        |                     |             |           |            |
| Battista (1999)           | <i>C. virginica</i> | Unknown §   | No        | No         |
| Barnes et al. (2007)      | <i>C. virginica</i> | Yes         | No        | No         |
| Starke et al. (2011)      | <i>C. virginica</i> | Yes         | No        | No         |
| Pollack et al. (2012)     | <i>C. virginica</i> | Unknown §   | Yes ‡     | No         |
| Soniat et al. (2013)      | <i>C. virginica</i> | Yes         | No        | No         |
| Swannack et al. (2014)    | <i>C. virginica</i> | Yes         | No        | No         |
| This study                | <i>C. virginia</i>  | Yes         | Yes †     | Yes        |

\* The HSI was not calibrated because index values did not span the range from 0 to 1.

§ The HSI calibration status is unknown because index values are reported as a range from low to high, and not from 0 to 1.

† The HSI was not verified before being validated, but because it was validated, it is also considered to be verified.

‡ Abundance data was collected using an oyster dredge, which provides qualitative, not quantitative, estimates of density. Consequently, the HSI was verified, not validated.





FIGURE CAPTIONS

2 FIGURE 1. Map showing the location of the Great Wicomico River in relation to  
Chesapeake Bay.

4 FIGURE 2. Relationships between the actual value of environmental variables and  
associated habitat suitability values for (a) water depth (surrogate variable for dissolved  
6 oxygen), (b) salinity, and (c) bottom type (MC = muddy clay, SM = sandy mud, MS =  
muddy sand, S = sand, HB = hard bottom). Scores of 0 are unsuitable and values of 1 are  
8 optimal.

FIGURE 3. Distribution of high vertical relief reefs (HRR) and low vertical relief reefs  
10 (LRR) in the US Army Corps of Engineers network of sanctuary reefs in the Great  
Wicomico River.

12 FIGURE 4. A) Depth suitability layer. B) Salinity suitability layer. C) Bottom type  
suitability layer. D) Habitat suitability index output, red areas are unsuitable oyster  
14 habitat, green areas are optimal oyster habitat.

FIGURE 5. Sigmoid relationship between habitat suitability index score and associated live  
16 adult oyster density on HRR and LRR. The solid line represents the relationship for HRR  
and the dashed line represents the relationship for LRR.

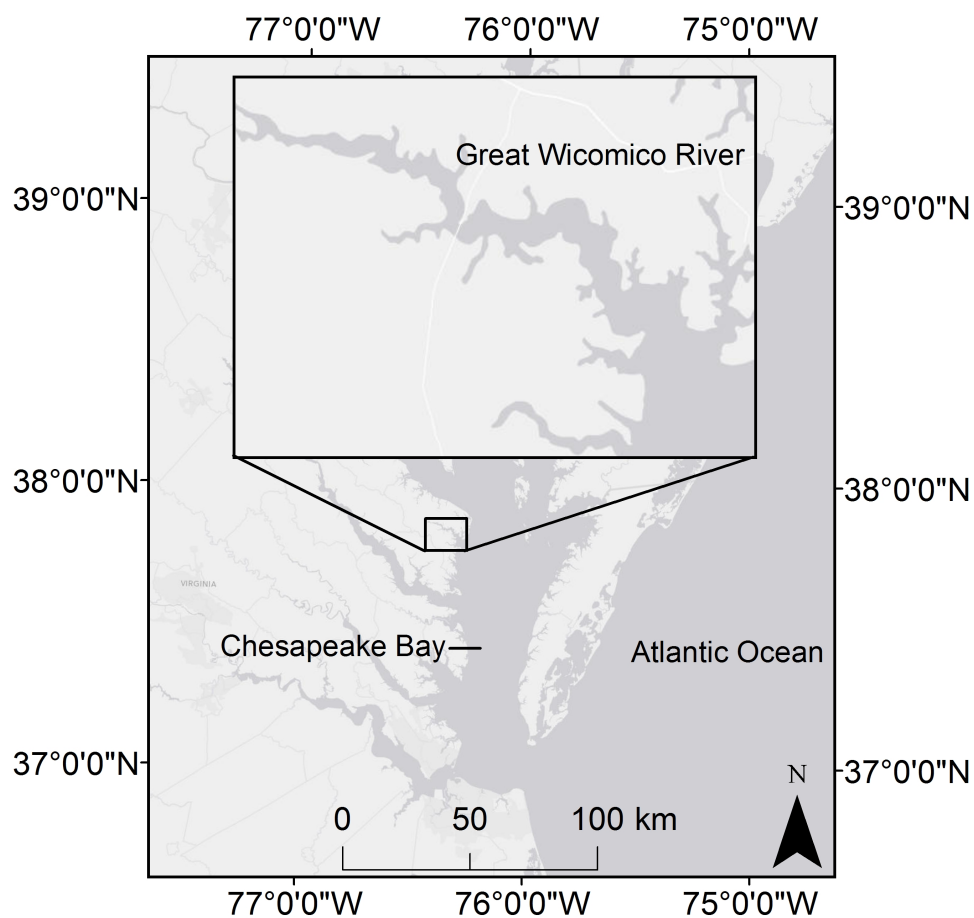

FIGURE 1. Map showing the location of the Great Wicomico River in relation to Chesapeake Bay.

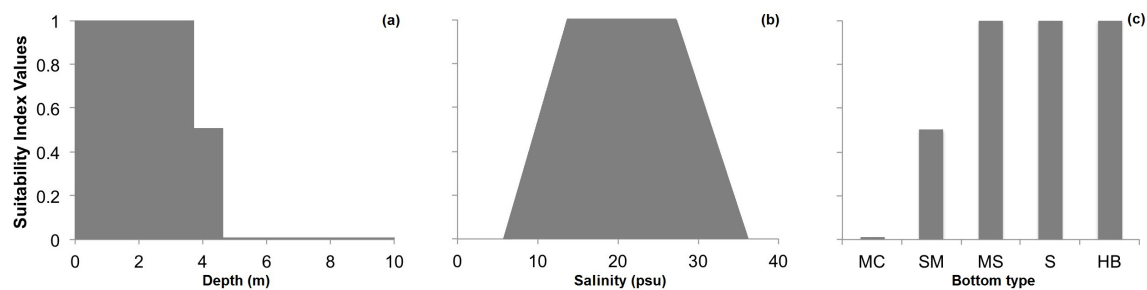

FIGURE 2. Relationships between the actual value of environmental variables and associated habitat suitability values for (a) water depth (surrogate variable for dissolved oxygen), (b) salinity, and (c) bottom type (MC = muddy clay, SM = sandy mud, MS = muddy sand, S = sand, HB = hard bottom). Scores of 0 are unsuitable and values of 1 are optimal.

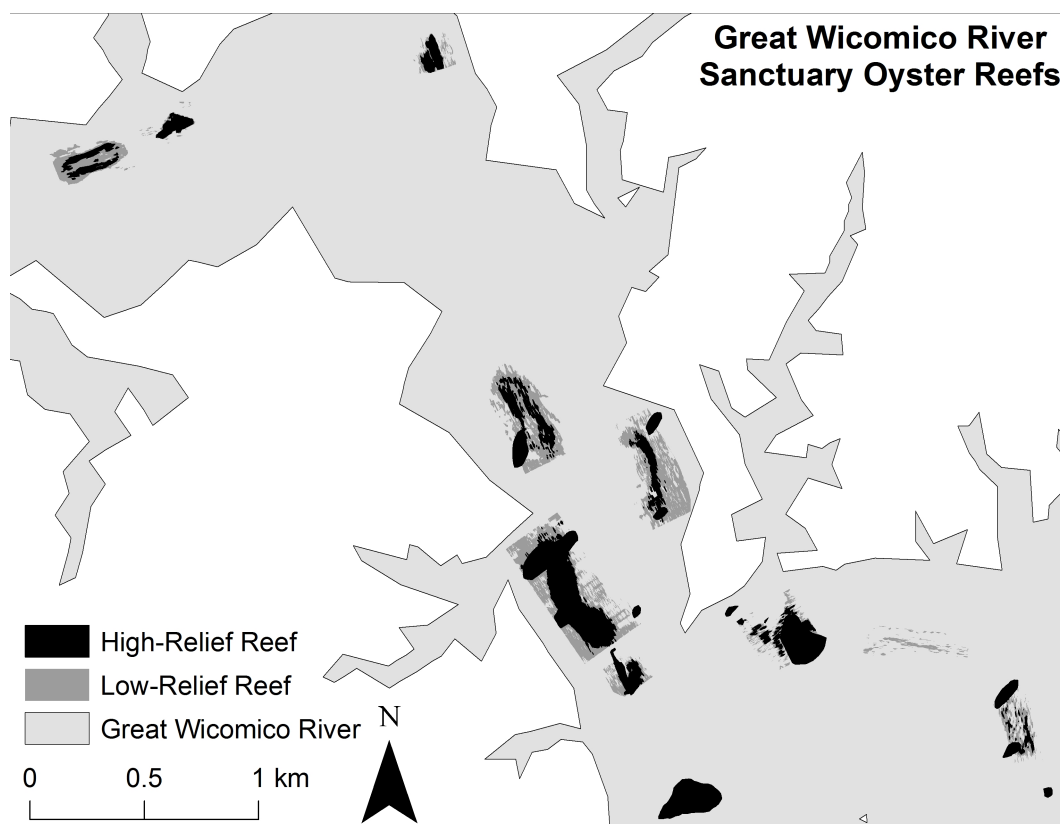

FIGURE 3. Distribution of high-relief reefs (HRR) and low-relief reefs (LRR) in the US Army Corps of Engineers network of sanctuary reefs in the Great Wicomico River.

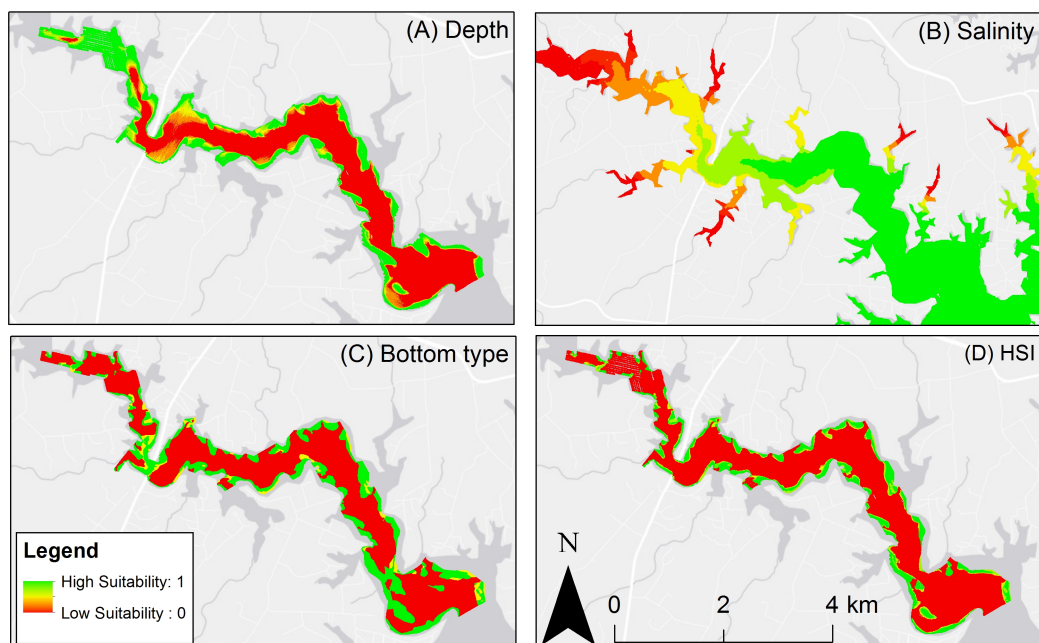

FIGURE 4. A) Depth suitability layer. B) Salinity suitability layer. C) Bottom type suitability layer. D) Habitat suitability index output, red areas are unsuitable oyster habitat, green areas are optimal oyster habitat.

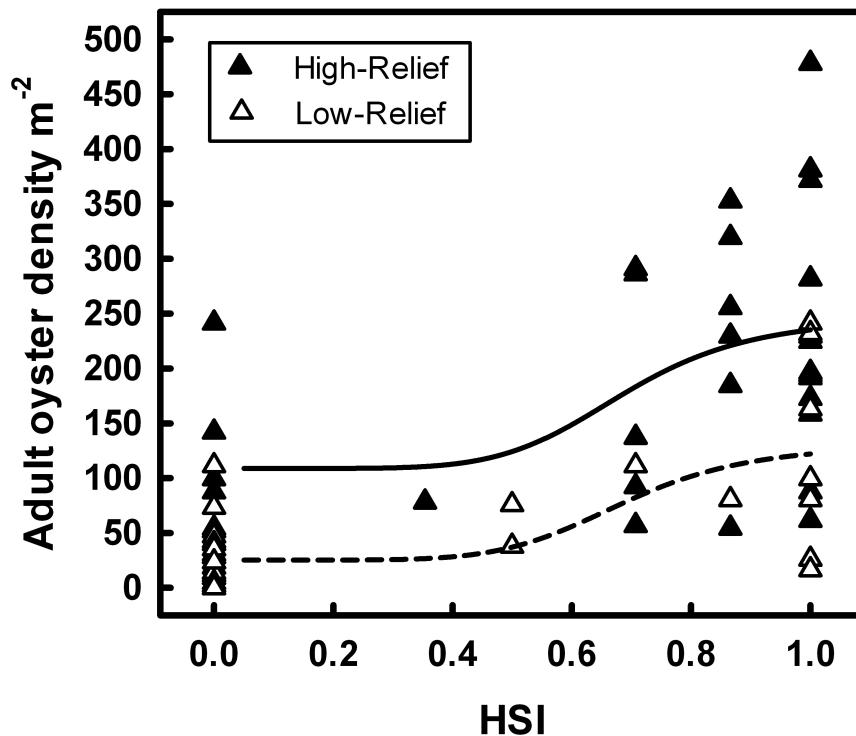

FIGURE 5. Sigmoid relationship between habitat suitability index score and associated live adult oyster density on HRR and LRR. The solid line represents the relationship for HRR and the dashed line represents the relationship for LRR.
